# Supplementary material for: A Preclinical Investigation of GBM-N019 as a Potential Inhibitor of Glioblastoma via Exosomal mTOR/CDK6/STAT3 Signaling
Source: MDPI journal article supplement (doi:10.3390/cells10092391), 2021-09-11
Supplement: s1 [file s1]

**Supplementary table S1:** Primers used for the qPCR experiments.

(5'→3')

|              |                                 |
|--------------|---------------------------------|
| Actin -F     | TTG TTA CAG GAA GTC CCT TGC C   |
| Actin -R     | ATG CTA TCA CCT CCC CTG TGT G   |
| AKT1 -F2     | CTA CCC ACA CAG CAG TAC GC      |
| AKT1 -R2     | AAG TCG CTG GTG TTA AGC CG      |
| CD133 -F     | TTC TTG ACC GAC TGA GAC CCA     |
| CD133 -R     | TCA TGT TCT CCA ACG CCT CTT     |
| CDK6 -F      | CCA GAT GGC TCT AAC CTC AGT     |
| CDK6 -R      | AAC TTC CAC GAA AAA GAG GCT T   |
| β-catenin -F | ACT GGC AGC AAC AGT CTT ACC     |
| β-catenin -R | TTT GAA GGC AGT CTG TCG TAA T   |
| STAT3 -F     | ACC AGC AGT ATA GCC GCT TC      |
| STAT3 -R     | GCC ACA ATC CGG GCA ATC T       |
| mTOR -F      | CTG GGA CTC AAA TGT GTG CAG TTC |
| mTOR -R      | GAA CAA TAG GGT GAA TGA TCC GGG |
| Nanog -F     | ATG GAG GAG GGA AGA GGA GA      |
| Nanog -R     | GAT TTG TGG GCC TGA AGA AA      |
| SOX2 -F      | ACA CCA ATC CCA TCC ACA CT      |
| SOX2 -R      | GCA AAC TTC CTG CAA AGC TC      |
|              |                                 |

**Supplementary table S2:** primary antibodies used for western blot analysis.

|                   |               |                                                                     |
|-------------------|---------------|---------------------------------------------------------------------|
| $\beta$ -actin    | 1:5000        | Proteintech, Beta Actin Antibody, Rabbit Polyclonal , 20536-1-AP    |
| $\alpha$ -tubulin | 1:2000-1:5000 | Proteintech, alpha Tubulin Antibody, Rabbit Polyclonal , 11224-1-AP |
| Akt               | 1:1000        | Cell Signaling, Akt Antibody, Rabbit, #9272                         |
| p-Akt             | 1:1000        | Cell Signaling, Phospho-Akt (Ser473) (D9E) XP® Rabbit mAb #4060     |
| CDK6              | 1:1000        | Cell Signaling, CDK6 (DCS83) Mouse mAb, #3136                       |
| GAPDH             | 1:5000-20000  | Proteintech, GAPDH Antibody, Rabbit Polyclonal, 10494-1-AP          |
| mTOR              | 1:1000        | Cell Signaling, mTOR (7C10) Rabbit mAb #2983                        |
| p-mTOR            | 1:1000        | Cell Signaling, Phospho-mTOR (Ser2481) Antibody #2974               |
| p-mTOR            | 1:500-1:1000  | ABclonal, Phospho-mTOR-S2448, Rabbit mAb, AP0115                    |
| NF- $\kappa$ B    | 1:1000        | Cell Signaling, NF- $\kappa$ B p65 (D14E12) XP® Rabbit mAb #8242    |
| STAT3             | 1:1000        | Cell Signaling, Stat3 (79D7) Rabbit mAb, #4904                      |
| p-STAT3           | 1:1000        | Cell Signaling, Phospho-Stat3 (Tyr705) (D3A7) XP® Rabbit mAb, #9145 |
| STAT3             | 1:500-1:2000  | ABclonal, STAT3, Rabbit pAb, A11216                                 |
| p-STAT3           | 1:500-1:2000  | ABclonal, Phospho-Stat3-Y708, Rabbit pAb, AP0070                    |
| STK4              | 1:500-1:2000  | ABclonal, STK4, Polyclonal Antibody, A8043                          |
| TGF- $\beta$ 1    | 1:1000        | Proteintech, TGF-Beta 1 Antibody, Rabbit Polyclonal, 18978-1-AP     |
| WISP1             | 1:500-1000    | Proteintech, WISP1 Antibody, Rabbit polyclonal , 18166-1-AP         |
| KRAS              | 1:2000        | Proteintech, KRAS Antibody, Rabbit polyclonal, 12063-1-AP           |
| p-Raf 1 (Ser259)  | 1:1000        | EnoGene, Raf-1 (Phospho-Ser259) Rabbit, E011006                     |
| p-Mek 1 (Ser221)  | 1:1000        | EnoGene, MEK1 (Phospho-Ser221) Rabbit, E11-7147A                    |
| GAPDH             | 1:5000-10000  | Proteintech, GAPDH Antibody, Rabbit Polyclonal, 10494-1-AP          |

**Supplementary table S3:** SWISSADME predicted GBM-N019 potential drug target

| Target                                                  | Common Uniprot ID name |        | ChEMBL ID  | Target Class         |
|---------------------------------------------------------|------------------------|--------|------------|----------------------|
| PI3-kinase p110-delta subunit                           | PIK3CD                 | O00329 | CHEMBL3130 | Enzyme               |
| PI3-kinase p110-beta subunit                            | PIK3CB                 | P42338 | CHEMBL3145 | Enzyme               |
| PI3-kinase p110- gamma subunit                          | PIK3CG                 | P48736 | CHEMBL3267 | Enzyme               |
| Cyclin-dependent kinase 6                               | CDK6                   | Q00534 | CHEMBL2508 | Kinase               |
| Cyclin-dependent kinase 4                               | CDK4                   | P11802 | CHEMBL331  | Kinase               |
| Cyclin-dependent kinase 9                               | CDK9                   | P50750 | CHEMBL3116 | Kinase               |
| Inhibitor of nuclear factor kappa B kinase beta subunit | IKBKB                  | O14920 | CHEMBL1991 | Kinase               |
| Inhibitor of NF-kappa- B kinase (IKK)                   | CHUK                   | O15111 | CHEMBL3476 | Kinase               |
| Signal transducer and activator of transcription        | STAT                   | P42226 | CHEMBL5401 | Transcription factor |
| Serine/threonine- protein kinase mTOR                   | MTOR                   | P42345 | CHEMBL2842 | Kinase               |

**Supplementary table S4:** Drug likeness and ADME property of GBM-N019

| Physicochemical Properties   | GBM_N019              | Acceptable limit   |
|------------------------------|-----------------------|--------------------|
| Molecular Weight             | 413.92 g/mol          | ≤ 500              |
| Violation of Lipinski's rule | 0                     | 0                  |
| No of Rotatable bonds        | 7                     | <10                |
| No of H-bond donor           | 3                     | ≤ 5                |
| No of H-acceptor             | 4                     | ≤10                |
| Molar refractivity           | 118.41                | 40-130             |
| Total polar surface area     | 102.49 Å <sup>2</sup> | ≤ 100              |
| Consensus Log Po/w           | 4.02                  | ≤ 5                |
| Synthetic accessibility      | 3.26                  | 1(best) - 10(poor) |

**Supplementary table S5:** molecular docking profiles of GBM-0N19 with STAT3, mTOR and CDK6

|                         | NSC77720<br>5_mTOR                                                        | DIS<br>(Å)   | NSC777207<br>_CDK6                                                               | DIS<br>(Å)   |  | NSC777207_STAT3                                            |
|-------------------------|---------------------------------------------------------------------------|--------------|----------------------------------------------------------------------------------|--------------|--|------------------------------------------------------------|
| $\Delta G$ =(Kcal/mol)  | -7.6                                                                      |              | -8.1                                                                             |              |  | -6.9                                                       |
| No. hydrophobic contact | 4                                                                         |              | 3                                                                                |              |  |                                                            |
| Conventional H-bond     | ASN1899<br>GLN1937                                                        | 2.79<br>3.07 | VAL64<br>VAL77                                                                   | 2.80<br>2.07 |  | ASN5                                                       |
| C-H bond                | PRO1940                                                                   | 3.59         | HIS78                                                                            | 3.39         |  |                                                            |
| Halogen bond            |                                                                           |              |                                                                                  |              |  | GLN66                                                      |
| $\pi$ -sigma            | GLN1937                                                                   |              |                                                                                  |              |  |                                                            |
| $\pi$ -cation           |                                                                           |              |                                                                                  |              |  |                                                            |
| $\pi$ -alkyl            | ILE1939<br>LEU1900                                                        |              | ARG78                                                                            |              |  |                                                            |
| $\pi$ - $\pi$ stacked   |                                                                           |              |                                                                                  |              |  | PHE33<br>TYR79                                             |
| Amide- $\pi$ stacked    |                                                                           |              | GLU72                                                                            |              |  |                                                            |
| Van der waal forces     | GLN2200<br>ALA1971<br>LEU1939<br>ASP2145<br>PRO2146<br>GLY1897<br>ASN1898 |              | PRO74<br>LYS160<br>PHE135<br>LEU135<br>LEU68<br>VAL76<br>LEU65<br>GLU69<br>LEU79 |              |  | PHE71<br>GLN67<br>ARG70<br>PRO36<br>SER2<br>ALA35<br>GLN32 |

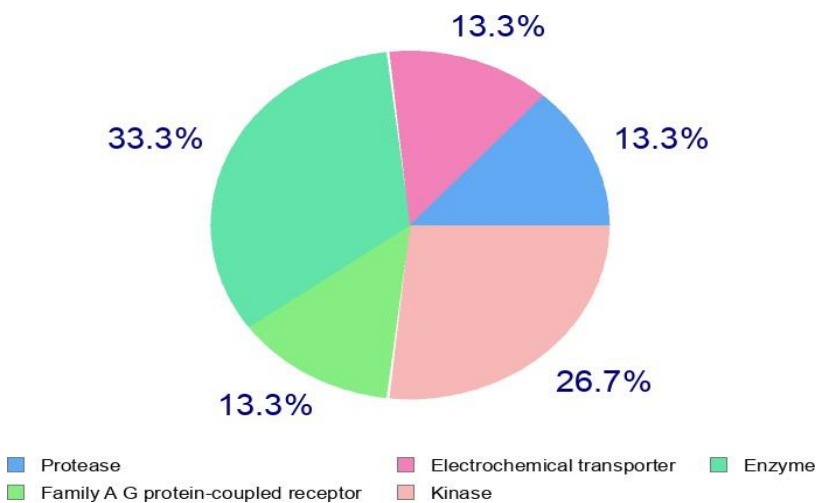

**Supplementary figure S1.** SWISSADME predicted classes of GBM-N019 potential drug target

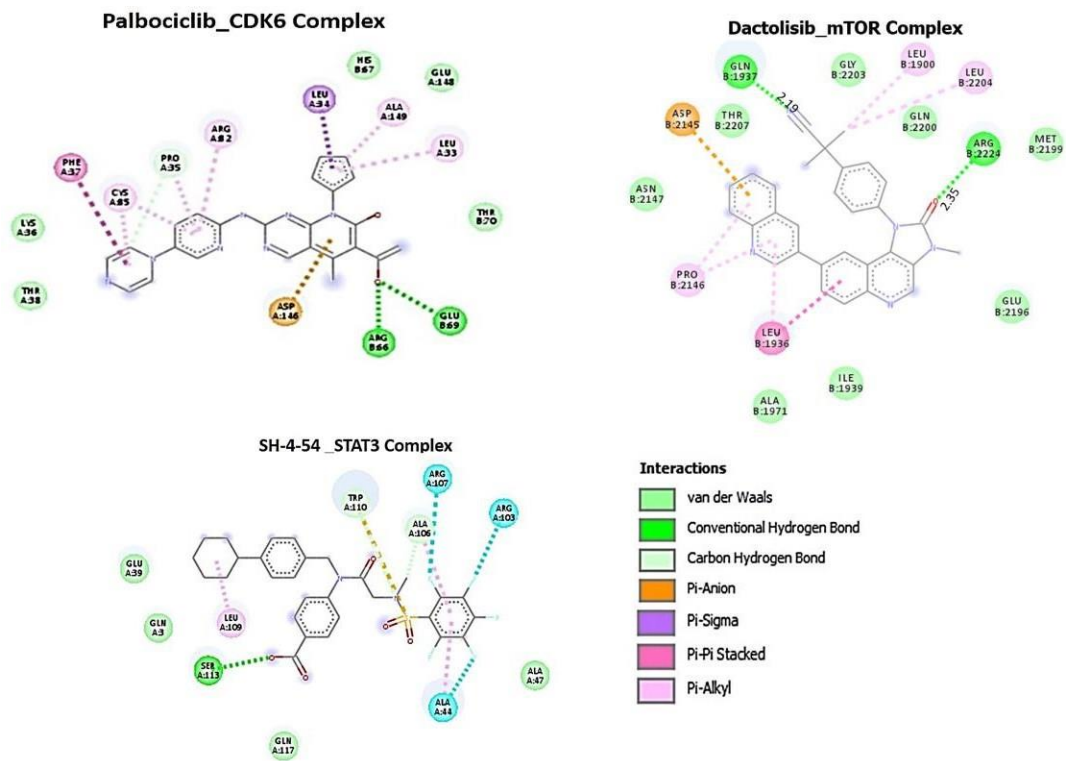

**Supplementary Figure S2:** molecular docking profiles of standard inhibitors with STAT3, mTOR and CDK6

Figure 4E

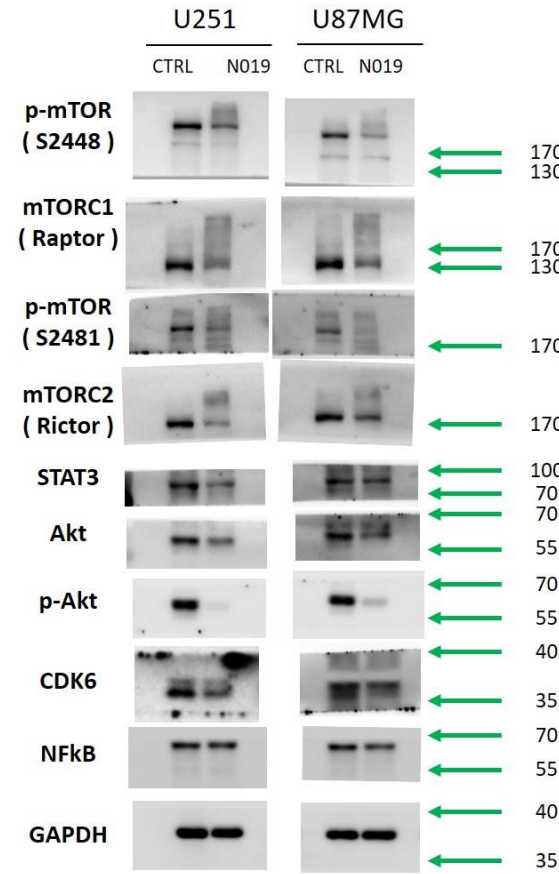

FIGURE 5C

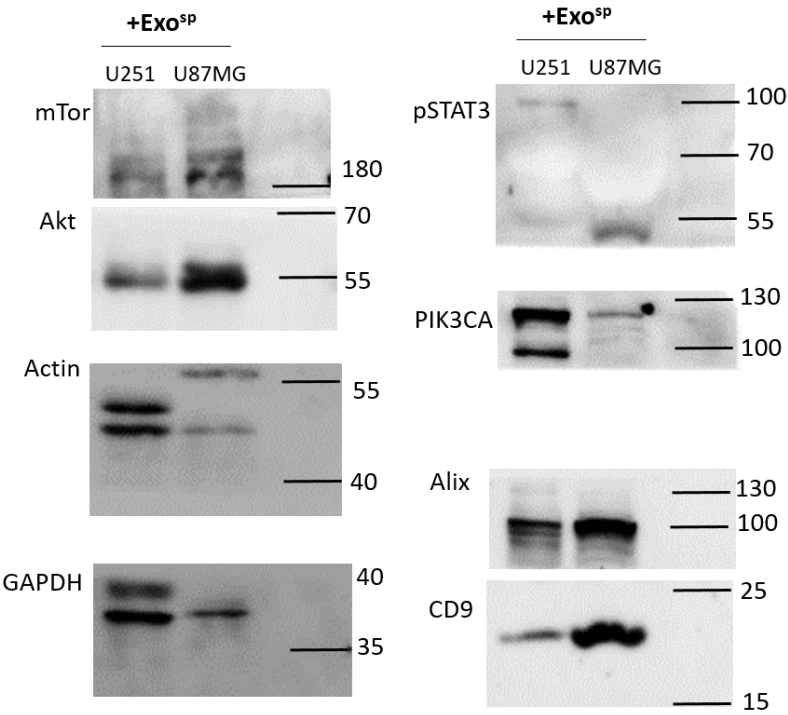

Figure 6D

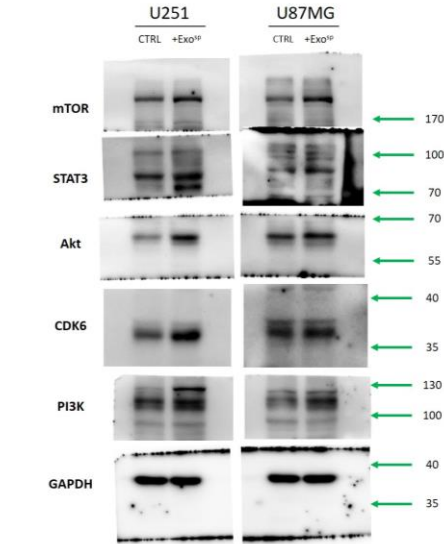

FIGURE 7D

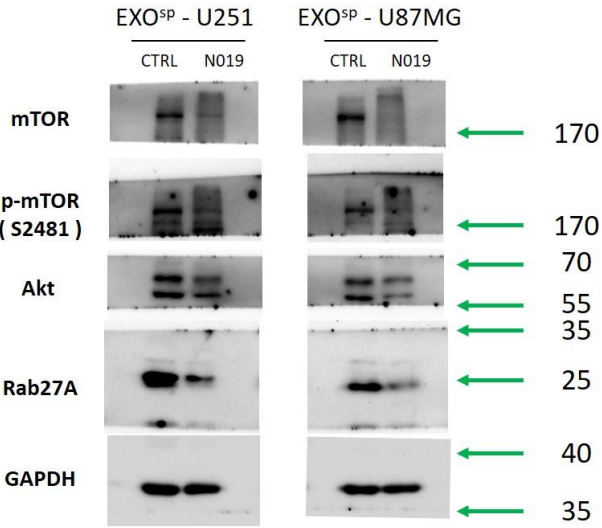

Figure 7. ( F )

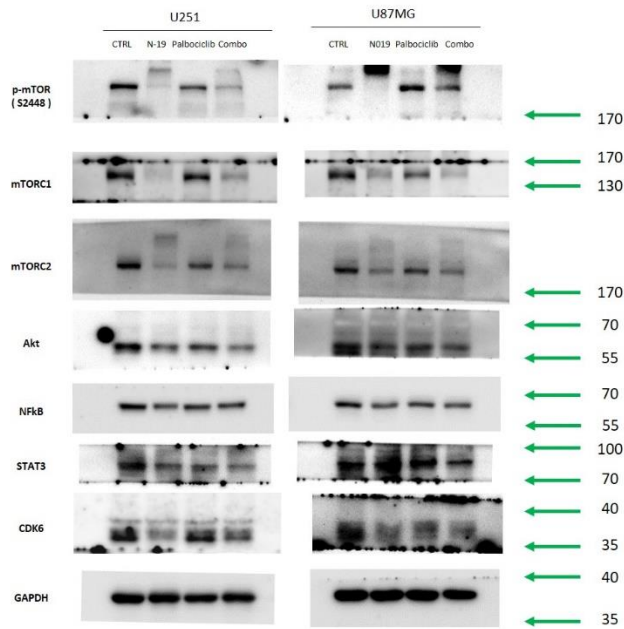

FIGURE 8D

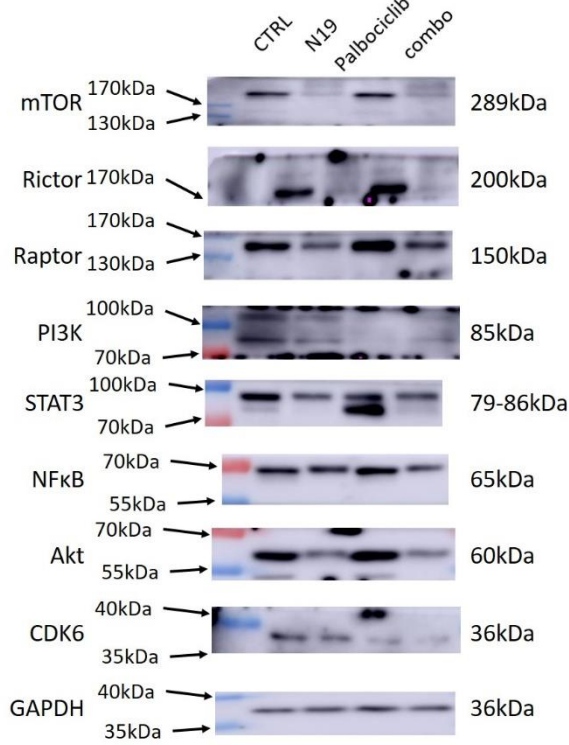

Supplementary Figure S3: Uncropped images of Western blots used in the figures
